# Supplementary material for: Factors Facilitating and Inhibiting the Implementation of Telerehabilitation—A Scoping Review
Source: MDPI journal article supplement (doi:10.3390/healthcare12060619), 2024-03-08
Supplement: s1 [file s1]

## Supplementary Materials

### Search strings

Table S1: Search string of Web of Science (search date 18/05/2022, updated on 02/10/2023).

| Number | Type of search term                                                                               | Search term                  |
|--------|---------------------------------------------------------------------------------------------------|------------------------------|
| #1     | TS                                                                                                | telerehab*                   |
| #2     | TS                                                                                                | tele-rehab*                  |
| #3     | TS                                                                                                | erehab*                      |
| #4     | TS                                                                                                | e-rehab*                     |
| #5     | TS                                                                                                | virtual* NEAR/5 rehab*       |
| #6     | TS                                                                                                | remote* NEAR/5 rehab*        |
| #7     | TS                                                                                                | digital* NEAR/5 rehab*       |
| #8     | TS                                                                                                | online NEAR/5 rehab*         |
| #9     | TS                                                                                                | mobile NEAR/5 rehab*         |
| #10    | TS                                                                                                | web-based NEAR/5 rehab*      |
| #11    | TS                                                                                                | computer-based NEAR/5 rehab* |
| #12    | TS                                                                                                | internet-based NEAR/5 rehab* |
| #13    | #1 OR #2 OR #3 OR #4 OR #5 OR #6 OR #7 OR #8 OR #9 OR #10 OR #11 OR #12                           |                              |
| #14    | TS                                                                                                | influnc*                     |
| #15    | TS                                                                                                | barrier*                     |
| #16    | TS                                                                                                | inhibit*                     |
| #17    | TS                                                                                                | imped*                       |
| #18    | TS                                                                                                | hinder*                      |
| #19    | TS                                                                                                | hindrance*                   |
| #20    | TS                                                                                                | facilitat*                   |
| #21    | TS                                                                                                | promot*                      |
| #22    | #14 OR #15 OR #16 OR #17 OR #18 OR #19 OR #20 OR #21                                              |                              |
| #23    | TS                                                                                                | diffusion of innovation      |
| #24    | TS                                                                                                | implement*                   |
| #25    | TS                                                                                                | adopt*                       |
| #26    | TS                                                                                                | realis*                      |
| #27    | TS                                                                                                | realiz*                      |
| #28    | #23 OR #24 OR #25 OR #26 OR #27                                                                   |                              |
| #29    | #13 AND #22 AND #28<br>AND (LA="GERMAN" OR "ENGLISH")<br>AND (Timespan: 2012-05-18 to 2023-10-02) |                              |

**Table S2: Search string of MEDLINE (Search date 18/05/2022, updated on 02/10/2023).**

| Number | Type of search term                                                                   | Search term             |
|--------|---------------------------------------------------------------------------------------|-------------------------|
| #1     | MeSH                                                                                  | telerehabilitation      |
| #2     | Titel/Abstract                                                                        | telerehab*              |
| #3     | Titel/Abstract                                                                        | tele-rehab*             |
| #4     | Titel/Abstract                                                                        | erehab*                 |
| #5     | Titel/Abstract                                                                        | e-rehab*                |
| #6     | #1 OR #2 OR #3 OR #4 OR #5                                                            |                         |
| #7     | Titel/Abstract                                                                        | virtual*                |
| #8     | Titel/Abstract                                                                        | remote*                 |
| #9     | Titel/Abstract                                                                        | digital*                |
| #10    | Titel/Abstract                                                                        | online                  |
| #11    | Titel/Abstract                                                                        | mobile                  |
| #12    | Titel/Abstract                                                                        | web-based               |
| #13    | Titel/Abstract                                                                        | computer-based          |
| #14    | Titel/Abstract                                                                        | internet-based          |
| #15    | Titel/Abstract                                                                        | rehab*                  |
| #16    | (#7 OR #8 OR #9 OR #10 OR #11 OR #12 OR #14) AND #15                                  |                         |
| #17    | #6 OR #16                                                                             |                         |
| #18    | Titel/Abstract                                                                        | influenc*               |
| #19    | Titel/Abstract                                                                        | barrier*                |
| #20    | Titel/Abstract                                                                        | inhibit*                |
| #21    | Titel/Abstract                                                                        | imped*                  |
| #22    | Titel/Abstract                                                                        | hinder*                 |
| #23    | Titel/Abstract                                                                        | hindrance*              |
| #24    | Titel/Abstract                                                                        | facilitat*              |
| #25    | Titel/Abstract                                                                        | promot*                 |
| #26    | #18 OR #19 OR #20 OR #21 OR #22 OR #23 OR #24 OR #25                                  |                         |
| #27    | MeSH                                                                                  | diffusion of innovation |
| #28    | Titel/Abstract                                                                        | diffusion of innovation |
| #29    | Titel/Abstract                                                                        | implement*              |
| #30    | Titel/Abstract                                                                        | adopt*                  |
| #31    | Titel/Abstract                                                                        | realis*                 |
| #32    | Titel/Abstract                                                                        | realiz*                 |
| #33    | #27 OR #28 OR #29 OR #30 OR #31 OR #32                                                |                         |
| #34    | (#17 AND #26 AND #33)<br>AND ((y_10[Filter]) AND (english[Filter] OR german[Filter])) |                         |

**Table S3: Search string of Embase (Search date 18/05/2022, updated on 02/10/2023).**

| Number | Type of search term                                                               | Search term                  |
|--------|-----------------------------------------------------------------------------------|------------------------------|
| #1     | exp                                                                               | telerehabilitation           |
| #2     | ab,ti                                                                             | tele rehab*                  |
| #3     | ab,ti                                                                             | telerehab*                   |
| #4     | ab,ti                                                                             | erehab*                      |
| #5     | ab,ti                                                                             | e-rehab*                     |
| #6     | ab,ti                                                                             | virtual* NEXT/5 rehab*       |
| #7     | ab,ti                                                                             | remote* NEXT/5 rehab*        |
| #8     | ab,ti                                                                             | digital* NEXT/5 rehab*       |
| #9     | ab,ti                                                                             | online NEXT/5 rehab*         |
| #10    | ab,ti                                                                             | mobile NEXT/5 rehab*         |
| #11    | ab,ti                                                                             | web based NEXT/5 rehab*      |
| #12    | ab,ti                                                                             | computer based NEXT/5 rehab* |
| #13    | ab,ti                                                                             | internet based NEXT/5 rehab* |
| #14    | #1 OR #2 OR #3 OR #4 OR #5 OR #6 OR #7 OR #8<br>OR #9 OR #10 OR #11 OR #12 OR #13 |                              |
| #15    | ab,ti                                                                             | influencc*                   |
| #16    | ab,ti                                                                             | barrier*                     |
| #17    | ab,ti                                                                             | inhibit*                     |
| #18    | ab,ti                                                                             | imped*                       |
| #19    | ab,ti                                                                             | hinder*                      |
| #20    | ab,ti                                                                             | hindrance*                   |
| #21    | ab,ti                                                                             | facilitat*                   |
| #22    | ab,ti                                                                             | promot*                      |
| #23    | #15 OR #16 OR #17 OR #18 OR #19 OR #20 #21 OR #22                                 |                              |
| #24    | exp                                                                               | diffusion of innovation      |
| #25    | ab,ti                                                                             | diffusion of innovation      |
| #26    | ab,ti                                                                             | implement*                   |
| #27    | ab,ti                                                                             | adopt*                       |
| #28    | ab,ti                                                                             | realis*                      |
| #29    | ab,ti                                                                             | realiz*                      |
| #30    | #24 OR #25 OR #26 OR #27 OR #28 OR #29                                            |                              |
| #31    | (#14 AND #23 AND #30) AND ([english]/lim OR [german]/lim)<br>AND [2012-2023]/py   |                              |

**Table S4. Search string of Psyn dex (Search date 18/05/2022, updated on 02/10/2023).**

| <b>Number</b> | <b>Search term</b>                                                       |
|---------------|--------------------------------------------------------------------------|
| #1            | telerehab*                                                               |
| #2            | tele-rehabilitation                                                      |
| #3            | e-rehabilitation                                                         |
| #4            | eRehab*                                                                  |
| #5            | virtual* N5 rehab*                                                       |
| #6            | remote* N5 rehab*                                                        |
| #7            | digital* N5 rehab*                                                       |
| #8            | online N5 rehab*                                                         |
| #9            | mobile N5 rehab*                                                         |
| #10           | web-based N5 rehab*                                                      |
| #11           | computer-based N5 rehab*                                                 |
| #12           | internet-based N5 rehab*                                                 |
| #13           | #1 OR #2 OR #3 OR #4 OR #5 OR #6 OR #7 OR #8 OR #9 OR #10 OR #11 OR #12  |
| #14           | influenc*                                                                |
| #15           | barrier*                                                                 |
| #16           | inhibit*                                                                 |
| #17           | imped*                                                                   |
| #18           | hinder*                                                                  |
| #19           | hindrance*                                                               |
| #20           | facilitat*                                                               |
| #21           | promot*                                                                  |
| #22           | #14 OR #15 OR #16 OR #17 OR #18 OR #19 OR #20 OR #21                     |
| #23           | diffusion of innovation                                                  |
| #24           | implement*                                                               |
| #25           | adopt*                                                                   |
| #26           | realis*                                                                  |
| #27           | realiz*                                                                  |
| #28           | #23 OR #24 OR #25 OR #26 OR #27                                          |
| #29           | (#13 AND #22 AND #28) AND (LA=deu OR LA=eng) AND (PY>=2012 AND PY<=2023) |

**Table S5. Study characteristics.**

| First author, year,           | Country      | Study design                                                                                                                            | Study population (patients) | Study population (health professionals)                        | Diagnosis group             | Type of TR                                                                                        | Status of implementation / experiences                                                                                               | Implementation framework |
|-------------------------------|--------------|-----------------------------------------------------------------------------------------------------------------------------------------|-----------------------------|----------------------------------------------------------------|-----------------------------|---------------------------------------------------------------------------------------------------|--------------------------------------------------------------------------------------------------------------------------------------|--------------------------|
| Ahonle (2021) [44]            | USA          | Qualitative design: semi-structured interviews (cross-sectional)                                                                        | N/A                         | Rehabilitation specialists (n = 3)                             | Various disabilities        | Teleconsultation, community-based rehabilitation for veterans (video-based)                       | After implementation in routine care                                                                                                 | N/A                      |
| Aloyuni (2020) [50]           | Saudi Arabia | Quantitative design: online-survey (cross-sectional)                                                                                    | N/A                         | PTs (n = 347)                                                  | Various diagnostic groups   | Image-based TR (videoconferences), sensor-based TR (tilt switches, gyroscope, accelerometers), VR | 19.9% of respondents use TR at work                                                                                                  | N/A                      |
| Auger (2023) [29]             | Canada       | Descriptive qualitative design: focus group, semi-structured interviews were conducted after the implementation phase (cross-sectional) | N/A                         | OTs, social workers, SLPs, PTs, others (n = 9)                 | Stroke                      | TR in post-stroke, videoconference                                                                | During implementation                                                                                                                | CFIR                     |
| Bairapareddy (2021) [25]      | India        | Quantitative study (feasibility study): online survey (cross-sectional)                                                                 | COPD patients (n = 30)      | Pulmonary care physicians, rehabilitation nurses, PTs (n = 52) | COPD                        | Smartphone-based TR for COPD management                                                           | Before implementation in routine care (A few HPs (n = 4) already implemented TR; patients had a minimum level of experience with TR) | N/A                      |
| Banerjee-Guenette (2019) [30] | Canada       | Mixed-methods-design: questionnaires, tracking of VR-usage                                                                              | N/A                         | PTs, OTs, one rehabilitation assistant (n = 11)                | Various paediatric diseases | Variety of VR/AVR, e.g., Nintendo Wii® and WiiFit®                                                | Before implementation                                                                                                                | DTBT                     |

Table S5. Study characteristics.

| First author, year,              | Country     | Study design                                                                                                                             | Study population (patients)                                                                                | Study population (health professionals)                  | Diagnosis group                                     | Type of TR                                                                                                                                                                     | Status of implementation / experiences                                        | Implementation framework               |
|----------------------------------|-------------|------------------------------------------------------------------------------------------------------------------------------------------|------------------------------------------------------------------------------------------------------------|----------------------------------------------------------|-----------------------------------------------------|--------------------------------------------------------------------------------------------------------------------------------------------------------------------------------|-------------------------------------------------------------------------------|----------------------------------------|
|                                  |             | (pre- and post-follow-up)                                                                                                                |                                                                                                            |                                                          |                                                     |                                                                                                                                                                                |                                                                               |                                        |
| <b>Brouns 2020 [51]</b>          | Netherlands | Quantitative study: online-survey (cross-sectional)                                                                                      | N/A                                                                                                        | BHP (n = 99), DHP (n = 105)                              | Stroke                                              | eRehabilitation: e.g. physical and cognitive exercises, education and communication, not further described                                                                     | 44% with and 66% without experiences                                          | Framework of Grol                      |
| <b>Caughlin et al. (2019) 31</b> | Canada      | Summary of six studies: (feasibility, pre and post-design, pilot trials, randomised controlled trials (RCTs), and observational studies) | Stroke patients:<br>1) (n = 44)<br>2) (n = 11)<br>3) (n = 7)<br>4) (n = 126)<br>5) (n = 74)<br>6) (n = 51) | 2) PTs, OTs, SLPs, managers, technical support: (n = 11) | Stroke                                              | 1) to 5): Different remote services for stroke patients, e. g., speech therapy, memory training, self-management, (e. g. via videoconference)<br>6) VR for upper limb training | Before implementation or in an early phase of implementation in routine care. | General model of stroke rehabilitation |
| <b>Cottrell (2017) [39]</b>      | Australia   | Qualitative descriptive study: semi-structured interviews (cross-sectional)                                                              | N/A                                                                                                        | PTs (n = 26)                                             | Chronic musculoskeletal diseases                    | TR in general                                                                                                                                                                  | Before implementation in routine care                                         | N/A                                    |
| <b>Cox (2017) [40]</b>           | Australia   | Quantitative study (implementation study): online-survey (pre-and post-design)                                                           | N/A                                                                                                        | PTs, OTs (n = 31 to 26)                                  | Neurologic, ageing or musculoskeletal disabilities: | Group education (videoconferences) for children and adults                                                                                                                     | During implementation in routine care                                         | TDF                                    |
| <b>Damhus et al. (2018) [48]</b> | Denmark     | Qualitative design: semi-structured interviews, focus                                                                                    | N/A                                                                                                        | HPs (n = 25)                                             | COPD                                                | Online-exercise sessions to patients with COPD, real-time video                                                                                                                | With experiences (n = 4 focus groups), without experiences, (n = 2            | TDF                                    |

**Table S5. Study characteristics.**

| First author, year,                 | Country      | Study design                                                                                                                    | Study population (patients)                                    | Study population (health professionals)                                                       | Diagnosis group               | Type of TR                                                                       | Status of implementation / experiences  | Implementation framework                                           |
|-------------------------------------|--------------|---------------------------------------------------------------------------------------------------------------------------------|----------------------------------------------------------------|-----------------------------------------------------------------------------------------------|-------------------------------|----------------------------------------------------------------------------------|-----------------------------------------|--------------------------------------------------------------------|
|                                     |              | groups (cross-sectional)                                                                                                        |                                                                |                                                                                               |                               | telemedical technology                                                           | focus groups, n = 3 interviews)         |                                                                    |
| <b>Duran 2023 [45]</b>              | USA          | Qualitative design: (improvement study): interviews, design workshops, usability testing (user-centred-design)                  | CR patients (n=3)                                              | Provider- and system-level stakeholders (n = 9) design workshops (n = 20), clinicians (n = 2) | Cardiac diseases              | Development of a TR-prototype: (e.g. telemonitoring, educational videos); hybrid | Before implementation in routine care   | TDF and CFIR                                                       |
| <b>Farzad (2023) [32]</b>           | Canada       | Qualitative descriptive study: semi-structured interviews (cross-sectional)                                                     | N/A                                                            | PTs, OTs (n = 14)                                                                             | Hand diseases                 | Online hand therapy in general (video-conference, videos)                        | With experiences in providing TR        | N/A                                                                |
| <b>Ferreira-Correia (2018) [49]</b> | South Africa | Qualitative descriptive design: semi-structured interviews, field notes (pre-and post-design)/a TR intervention was carried out | Patients with HIV (n = 4), patients with schizophrenia (n = 5) | N/A                                                                                           | HIV, schizophrenia            | CogMed Working Memory Training Programme                                         | Before implementation in routine care   | N/A                                                                |
| <b>Gorzelitz (2022) [46]</b>        | USA          | Qualitative design: semi-structured interviews (cross-sectional)                                                                | N/A                                                            | Program-representatives (n = 24)                                                              | Cancer                        | Different TR exercise programmes (video-based)                                   | After implementation in routine care    | CFIR                                                               |
| <b>Hale-Gallardo (2020) [47]</b>    | USA          | Qualitative design: semi-structured interviews (pre-and post-design)                                                            | N/A                                                            | Programme managers and medical directors (n = 10)                                             | Various disabilities          | National TR programme for veterans, video technology                             | During first 18 month of implementation | RE-AIM framework                                                   |
| <b>Hurtubise (2022) [33]</b>        | Canada       | Qualitative design: focus groups, interviews (participatory research design)                                                    | Parents of children with motor difficulties (n=4)              | Clinicians (n = 9), health care managers (n = 5) IT-consultants (n = 2)                       | Motor difficulties (children) | TR platform for children, not yet developed                                      | Before implementation in routine care   | A logic model for a new primary care TR intervention was developed |

**Table S5. Study characteristics.**

| First author, year,             | Country     | Study design                                                                                                                                  | Study population (patients)                   | Study population (health professionals)     | Diagnosis group                                    | Type of TR                                                                                                    | Status of implementation / experiences                                            | Implementation framework         |
|---------------------------------|-------------|-----------------------------------------------------------------------------------------------------------------------------------------------|-----------------------------------------------|---------------------------------------------|----------------------------------------------------|---------------------------------------------------------------------------------------------------------------|-----------------------------------------------------------------------------------|----------------------------------|
| <b>Jiancaro (2023) [34]</b>     | Canada      | Qualitative descriptive study: communication with patients and team, in-person meetings, documents (cognitive work analysis)                  | Patients with HIV (n = 33)                    | Members of the implementation team (n = 10) | HIV                                                | Tele-coaching exercise, online exercise class, wireless physical activity monitor (e. g. via videoconference) | During initial implementation phase                                               | Cognitive work analysis approach |
| <b>Kairy (2014) [35]</b>        | Canada      | Qualitative design: focus groups, semi-structured interviews, project documents (case study)                                                  | Patients (n = 5), family members (n = 5)      | HPs (n = 16), managers (n = 8)              | Traumatic brain injuries, spinal cord injuries     | Interprofessional care plans with HPs and patients, TR services (videoconference), patient education          | Particularly successful incorporated into routine care                            | Giddens' theory of structuration |
| <b>Kraaijkamp (2023) [52]</b>   | Switzerland | Quantitative study: multicentre online survey (cross-sectional)                                                                               | N/A                                           | HPs from 16 countries (n = 513)             | Geriatric diseases                                 | Different technologies, most apps and video conferencing                                                      | >50 percent had experience with eHealth, 20% integrated eHealth in daily practice | N/A                              |
| <b>Lau (2017) [41]</b>          | Australia   | Mixed-methods design (feasibility study): observation reports, issues log, emails, interviews; a TR intervention was carried out (case study) | Patients after a rotator cuff surgery (n = 9) | Clinicians (n = not mentioned)              | Orthopaedic disorders                              | Patient-facing app using the Healthy.me platform, exercise videos                                             | Before implementation in routine care                                             | N/A                              |
| <b>Munce et al. (2023) [36]</b> | Canada      | Qualitative descriptive design: interviews, focus groups (cross-sectional)                                                                    | N/A                                           | Physicians, OTs, PTs (n = 22)               | Neurological and cardiac disorders, long-term care | Toronto Rehab Telerehab Toolkit; TR technology not further described                                          | After implementation in routine care                                              | N/A                              |
| <b>Pitt (2018) [42]</b>         | Australia   | Qualitative design (feasibility study): semi-structured interviews were conducted after the                                                   | N/A                                           | SLPs (n = 3)                                | Aphasia                                            | TR Group Aphasia Intervention and Networking (TeleGAIN) (via videoconference)                                 | Before implementation in routine care, different                                  | N/A                              |



**Table S5. Study characteristics.**

| First author, year,             | Country   | Study design                                                                                                  | Study population (patients)  | Study population (health professionals)                                          | Diagnosis group                                                                  | Type of TR                                                                                         | Status of implementation / experiences                                   | Implementation framework |
|---------------------------------|-----------|---------------------------------------------------------------------------------------------------------------|------------------------------|----------------------------------------------------------------------------------|----------------------------------------------------------------------------------|----------------------------------------------------------------------------------------------------|--------------------------------------------------------------------------|--------------------------|
|                                 |           | intervention phase (cross-sectional) /                                                                        |                              |                                                                                  |                                                                                  |                                                                                                    | experiences with TR                                                      |                          |
| <b>Pol (2023) [37]</b>          | Canada    | Qualitative study: (exploratory study): focus groups (cross-sectional)                                        | N/A                          | Rehabilitation professionals from (a) Netherlands (n = 5) and (b) Canada (n = 9) | Neurological and orthopaedic disorders, geriatric rehabilitation                 | Evidence-based sensor monitoring intervention (SMI) for older adults                               | Group (a) with experience, group (b) no experience, but introduced       | MRC                      |
| <b>Rabanifar (2022) [26]</b>    | Iran      | Qualitative design: semi- structured interviews (cross-sectional)                                             | N/A                          | Managers, policy makers and service providers (n = 26)                           | Different diagnoses                                                              | TR in general                                                                                      | All with TR background (experiences in receiving or providing TR)        | N/A                      |
| <b>Ross (2022) [43]</b>         | Australia | Qualitative design: semi- structured interviews (cross-sectional)                                             | N/A                          | Physiotherapists (n = 25)                                                        | Musculoskeletal diseases, paediatric diseases, pelvic diseases                   | TR in general                                                                                      | After implementation in routine care                                     | N/A                      |
| <b>Teriö et al. (2019) [27]</b> | Uganda    | Mixed methods design (feasibility study): Semi-structured interviews, quantitative process data (single-case) | N/A                          | HPs (n = 12)                                                                     | Stroke                                                                           | Mobile phone-supported and family-centred rehabilitation intervention to increase daily activities | Before implementation in routine care                                    | i-PARIHS framework       |
| <b>Yang et al. (2021) [38]</b>  | Canada    | Mixed-methods-design: questionnaires, additional data, (pre-and post-design)                                  | Patients with stroke (n = 9) | N/A                                                                              | Stroke                                                                           | GRASP for individuals with stroke— video-conference software                                       | During implementation, the organisation continued to offer the programme | RE-AIMframework          |
| <b>Yosef (2022) [53]</b>        | Israel    | Mixed-methods-design (feasibility study): focus groups, questionnaire (cross-sectional)                       | N/A                          | OTs (n = 10)                                                                     | Chronic health conditions: neurological and orthopaedic disorders (older adults) | In-home TR service for older adults with chronic health conditions (videoconference)               | Before Implementation in routine care                                    | N/A                      |

\*N/A: not applicable, TR: Telerehabilitation, VR: Virtual Reality, AVR: Active Video Gaming, COPD: Chronic Obstructive Pulmonary Disease, CR: Cardiac Rehabilitation, PT: Physiotherapists, SLPs: Speech-Language Pathologists, OTs: Occupational Therapists, HPs: Health Professionals, BHP: Brazilian Healthcare Professionals, DHP: Dutch Healthcare Professionals, CFIR: Consolidated Framework

for Implementation research, RE-AIM: Reach, Effectiveness, Adoption, Implementation, Maintenance Framework, MRC: Medical Research Council Framework, i-PARIHS: The Promoting Action on Research Implementation in Health Services Framework, TDF: The Theoretical Domains Framework, DTPB: Decomposed Theory of Planned Behavior, GRASP: Graded Repetitive Arm Supplementary Programme
